# Supplementary material
Source: PubMed Central journal article supplement (PMC5338397)
Supplement: pnas.1615105114.sapp.pdf [file pnas.1615105114.sapp.pdf]

## **Cdon deficiency causes cardiac remodeling through hyperactivation of WNT/ $\beta$ -catenin signaling**

Myong-Ho Jeong<sup>1,3#</sup>, Hyun-Ji Kim<sup>2,3#</sup>, Jung-Hoon Pyun<sup>1,3</sup>, Kyu-Sil Choi<sup>3</sup>, Dong I. Lee<sup>4</sup>, Soroosh Solhjoo<sup>4</sup>, Brain O'Rourke<sup>4</sup>, Gordon F. Tomaselli<sup>4</sup>, Dong Seop Jeong<sup>5</sup>, Hana Cho<sup>2,3\*</sup>, Jong-Sun Kang<sup>1,3\*</sup>

<sup>a</sup>Department of Molecular Cell Biology, Sungkyunkwan University School of Medicine, Suwon, Korea 16419; <sup>b</sup>Samsung Biomedical Research Institute, Samsung Medical Center, Sungkyunkwan University School of Medicine, Seoul, Korea 06351; <sup>c</sup>Department of Physiology, Sungkyunkwan University School of Medicine, Suwon, Korea 16419; <sup>d</sup>Division of Cardiology, Department of medicine, Johns Hopkins University School of Medicine, Baltimore, MD 21205; and <sup>e</sup>Department of Thoracic and Cardiovascular Surgery, Samsung Medical Center, Sungkyunkwan University School of Medicine, Seoul, Korea 06351

<sup>#</sup>These authors contributed equally to this work.

<sup>\*</sup>Corresponding authors:

Jong-Sun Kang, Department of Molecular Cell Biology, Sungkyunkwan University School of Medicine, 2066, Seobu-Ro, Jangan-gu, Suwon, Gyunggi-do, Korea 440-746,

Phone: +82-31-299-6135, Fax: +82-31-299-6157. E-mail address: [kangj01@skku.edu](mailto:kangj01@skku.edu)

Hana Cho, Department of Physiology, Sungkyunkwan University School of Medicine, 2066, Seobu-Ro, Jangan-gu, Suwon, Gyunggi-do, Korea 440-746,

Phone: +82-31-299-6104. E-mail address: [hanacho@skku.edu](mailto:hanacho@skku.edu)

SI Appendix Figures

**A**

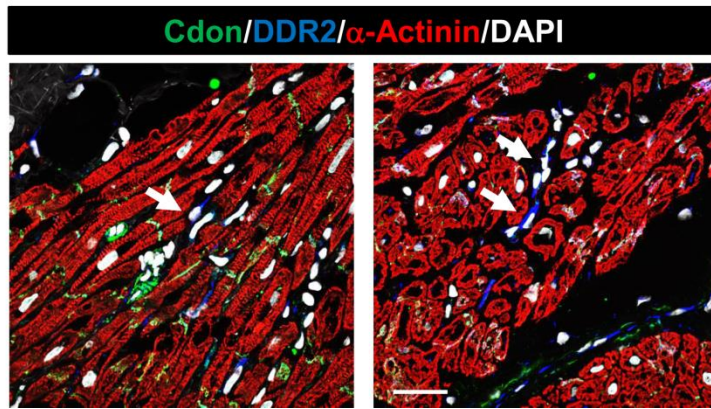

**B**

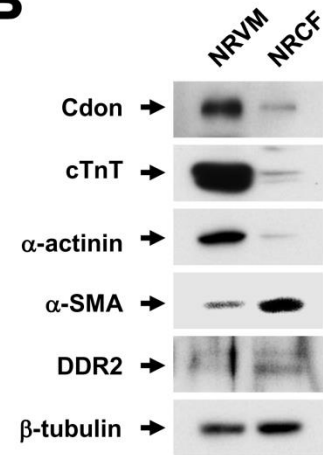

**SI Appendix figure 1. The predominant expression of Cdon in cardiomyocytes, compared to cardiac fibroblasts.** (A) Immunostaining of Cdon, DDR2 and  $\alpha$ -Actinin for human heart. Cdon is mainly expressed and localized in intercalate disc area of cardiomyocytes ( $\alpha$ -Actinin positive cells). Note little or no staining for Cdon in DDR2 positive cardiac fibroblasts. Scale bar = 100 $\mu$ m. (B) Western blot analysis for Cdon expression in NRVM and NRCF (new born rat cardiac fibroblast) cells. To isolation NRCF cells, isolated cardiac cells were enriched by prepalting for 1 hour, followed by subsequent removal of supernatant containing cardiomyocyte.

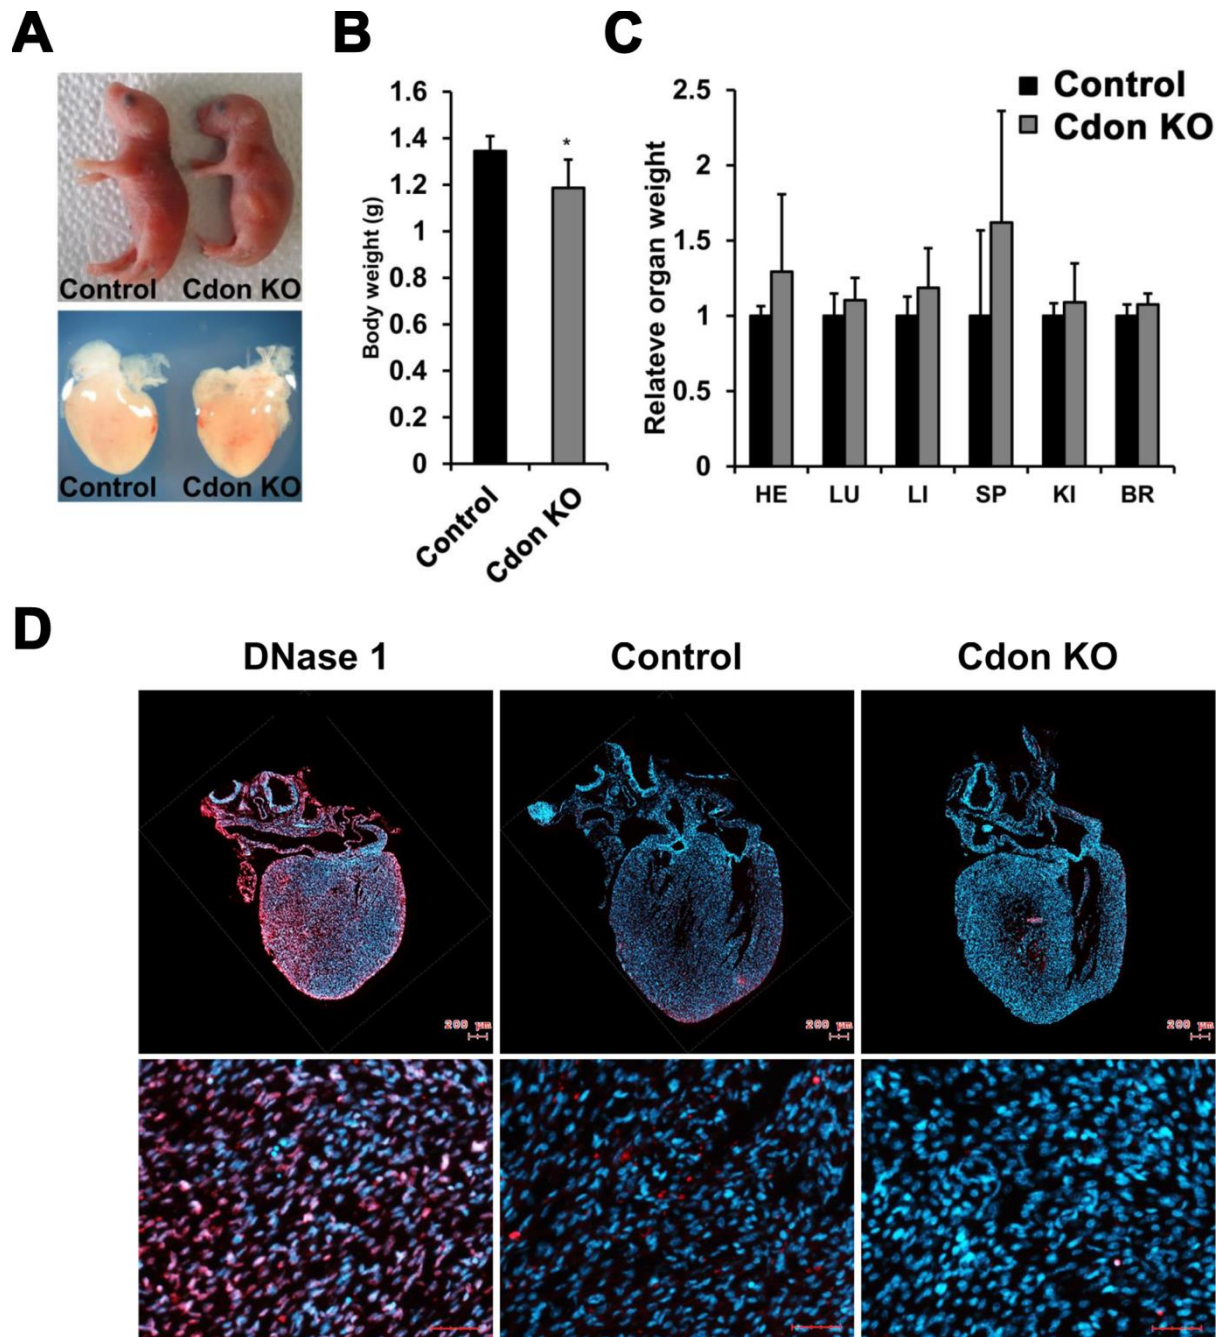

**SI Appendix figure 2. The relative organ weights to body weights in control and *Cdon*<sup>-/-</sup> littermates.** (A) Images of neonatal control *Cdon*<sup>+/+</sup> and *Cdon*<sup>-/-</sup> littermate mice and their hearts. (B) Body weights of control *Cdon*<sup>+/+</sup> or *Cdon*<sup>+/-</sup> and *Cdon*<sup>-/-</sup> littermates. n=6, \**P*<0.05. (C) The relative weight of organ weights to body weights from control *Cdon*<sup>+/+</sup> or *Cdon*<sup>+/-</sup> and *Cdon*<sup>-/-</sup> littermates at the postnatal day 1 (P1). He: Heart, Lu: lung, Li: Liver, Sp: Spleen, Ki: Kidney and Br: Brain. (D) Images from TUNEL assay with P1 control and *Cdon*<sup>-/-</sup> hearts. DNase I was used as positive control for TUNEL assay. Scale bar = 200μm.

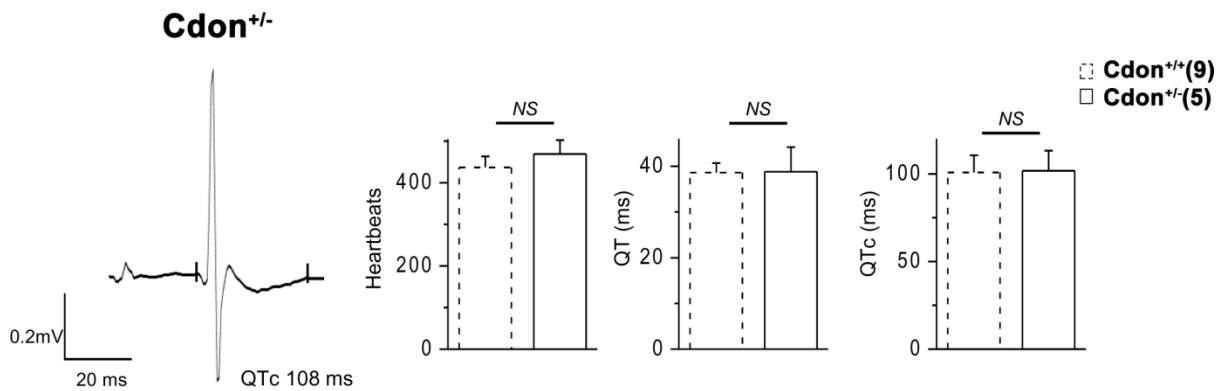

**SI Appendix figure 3. No alteration of ECGs in *Cdon*<sup>+/-</sup> mice.**

Left, Representative trace of ECGs of *Cdon*<sup>+/-</sup> mice at P14. Right, Bar graphs reveal no significant change in HR, QRS duration, and QTc interval, compared with *Cdon*<sup>+/+</sup> mice.

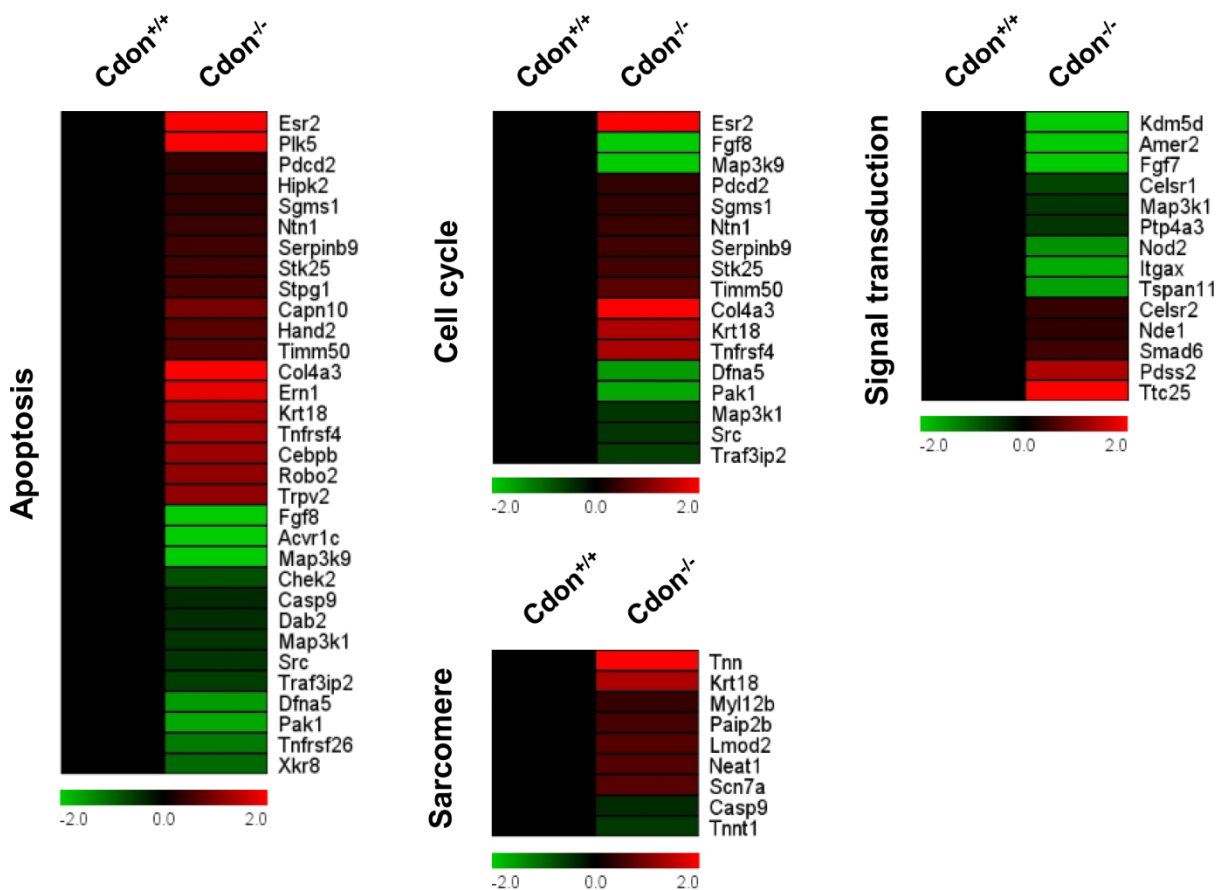

**SI Appendix figure 4. GO analysis for RNA transcription level of *Cdon*<sup>+/+</sup> and *Cdon*<sup>-/-</sup> neonatal hearts.** Heat maps for GO terms including apoptosis, cell cycle, signal transduction and sarcomere were shown. (>1.3 fold, average of normalized RC log<sub>2</sub> >2, p-value <0.05)



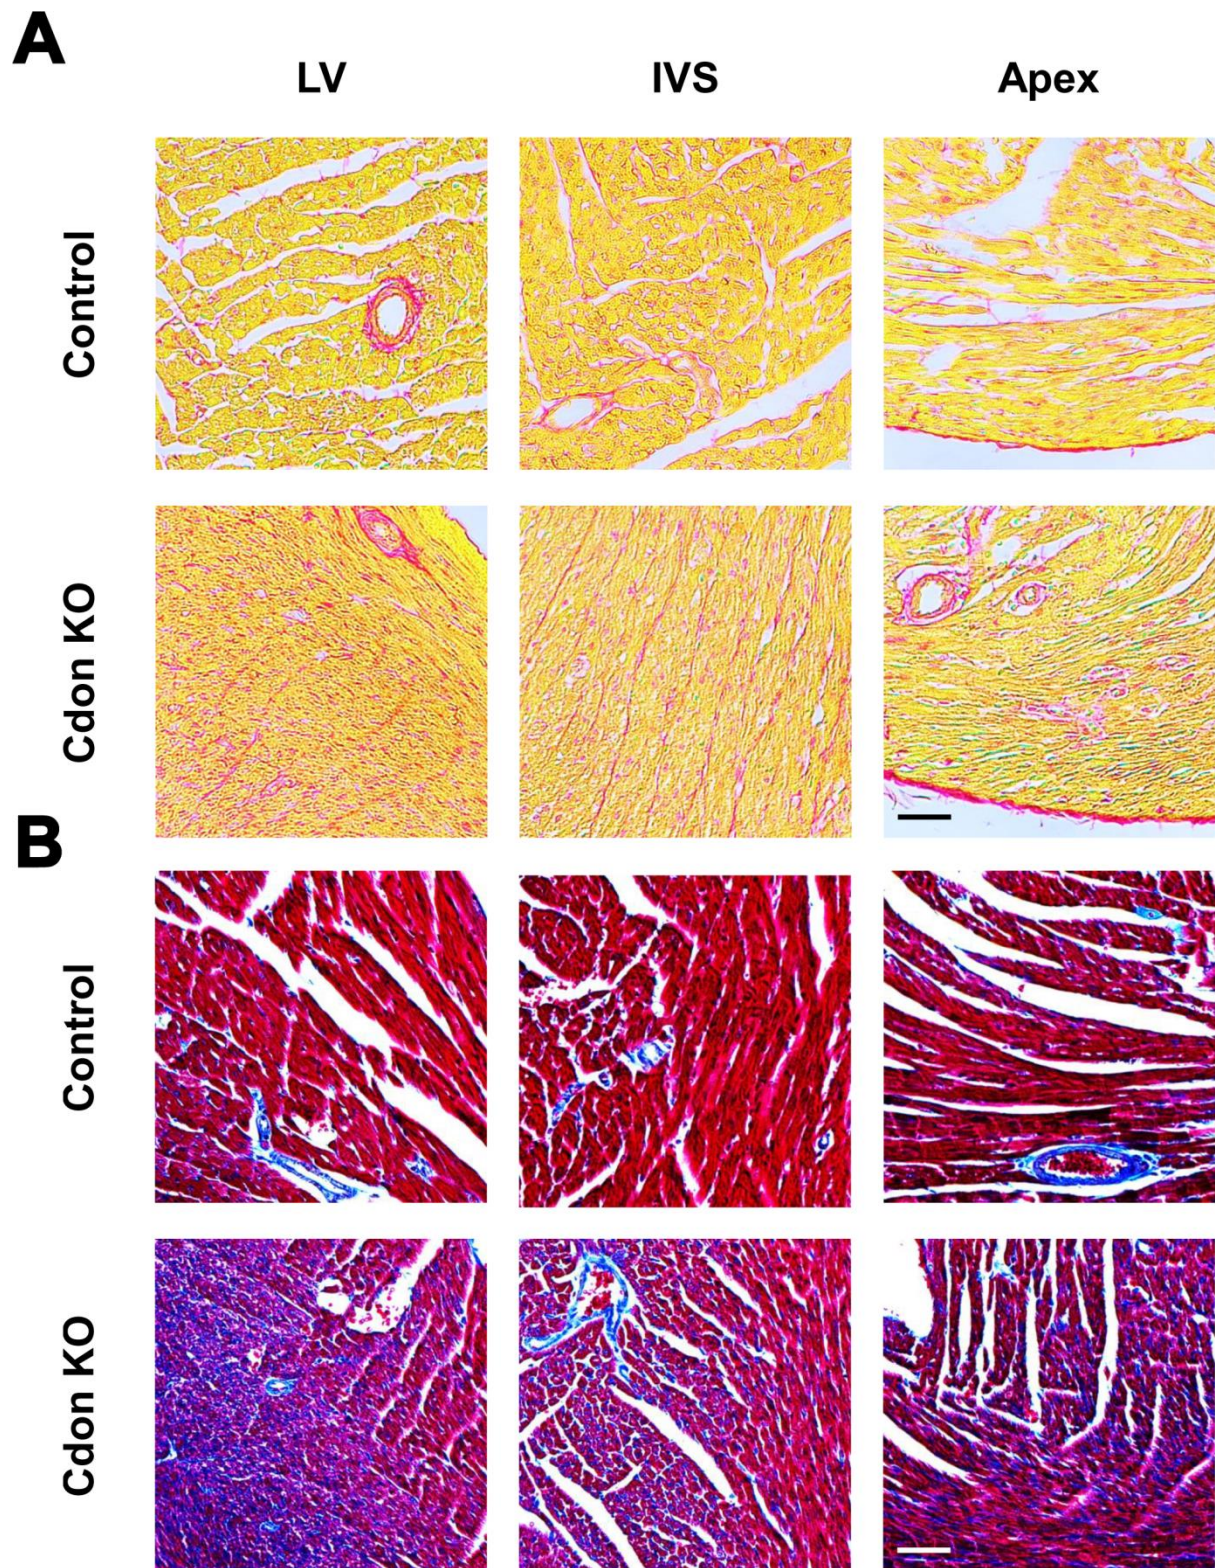

**SI Appendix figure 5. Cdon depletion can induce cardiac fibrosis.** Sirius red staining (**A**) and Masson's trichrome staining (**B**) were performed for 2 weeks old control and *Cdon*<sup>-/-</sup> hearts. LV; left ventricle, IVS; interventricular septum. Scale bar=100um.



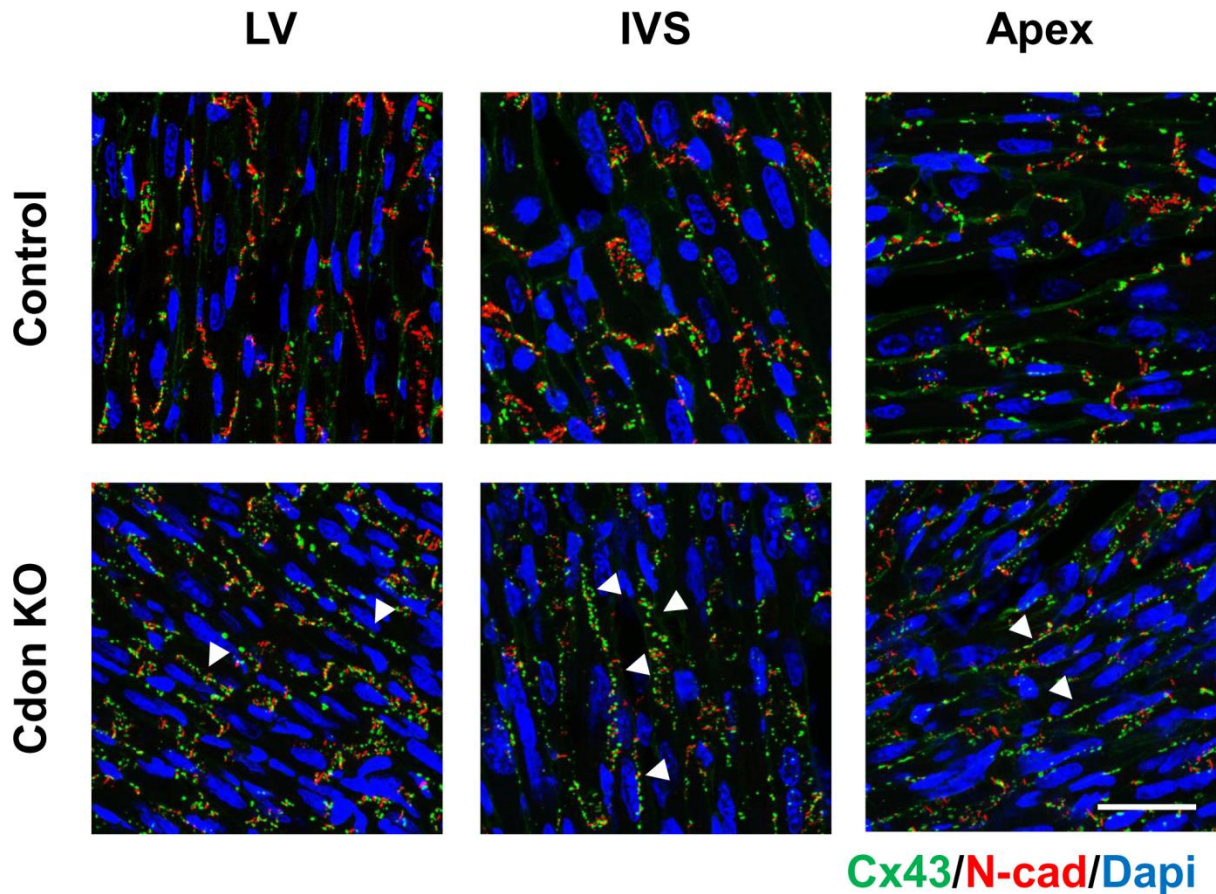

**SI Appendix figure 6. Abnormal localization of Cx43 in various regions of *Cdon*<sup>-/-</sup> hearts.** Representative images for the immunostaining of Cx43 (green) and N-cadherin (Red) for 2 weeks old control and *Cdon* KO hearts were shown, LV; left ventricle, IVS; interventricular septum. Lateralization of gap-junction was indicated with arrow heads in *Cdon*<sup>-/-</sup> heart images. Scale bar=50μm

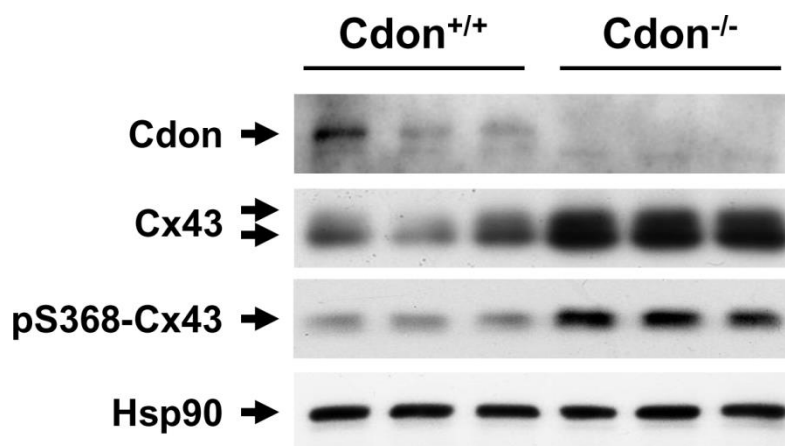

**SI Appendix figure 7. Immunoblotting analysis for Cx43 in *Cdon*<sup>+/+</sup> and *Cdon*<sup>-/-</sup> heart sample.** Note overall enhanced Cx43 levels in *Cdon*<sup>-/-</sup> hearts, including slow-migrating (phosphorylated) forms and a phosphorylated form of Cx43 at serine 368 (pS368-Cx43), relative to control WT hearts.

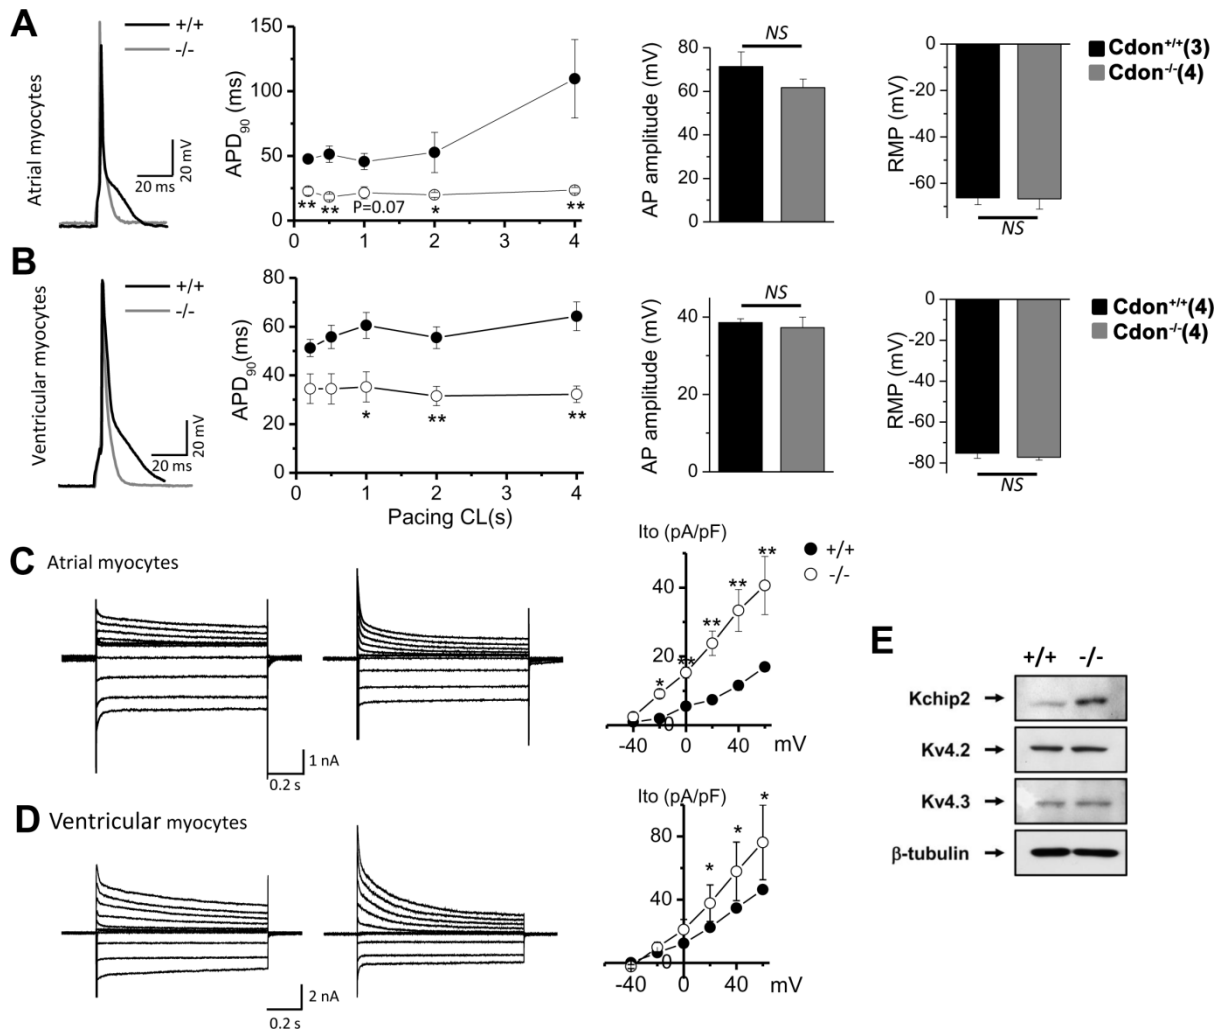

**SI Appendix figure 8. *Cdon* deficiency causes reduction of action potential duration (APD).** (A, B) Examples of APs of atrial myocytes (A) or ventricular myocytes (B) from *Cdon*<sup>+/+</sup> and *Cdon*<sup>-/-</sup> mice. Middle, plot of APD<sub>90</sub> over a range of pacing cycle lengths in *Cdon*<sup>+/+</sup> and *Cdon*<sup>-/-</sup> myocytes. Right, AP amplitude and resting membrane potential (RMP) in atrial (A) and ventricular myocytes (B) from *Cdon*<sup>-/-</sup> mice, compared to WT mice. Mean  $\pm$  S.E.M. *n*, the number of cells tested. (C, D) Left, Representative K<sup>+</sup> currents recorded in atrial myocytes (C) or ventricular myocytes (D) from *Cdon*<sup>+/+</sup> and *Cdon*<sup>-/-</sup> mice. All currents were recorded in the whole-cell configuration of the patch clamp. Right, The IV relationships for I<sub>to</sub> currents reveal an increase in I<sub>to</sub>. I<sub>to</sub> current was measured by subtracting the amplitude of the current measured at the end of the depolarizing voltage pulse (sustained current) from peak current amplitude. Current amplitude of each cell was normalized to its capacitance (*current density*; pA/pF). Filled circles indicate current density in WT, and open circles indicate current density in *Cdon*<sup>-/-</sup> myocytes. (E) Immunoblot analysis of KCHIP2, Kv4.2, and Kv4.3 in *Cdon*<sup>+/+</sup> and *Cdon*<sup>-/-</sup> hearts at postnatal day 7. \**p* < 0.05, \*\**p* < 0.01 vs control.

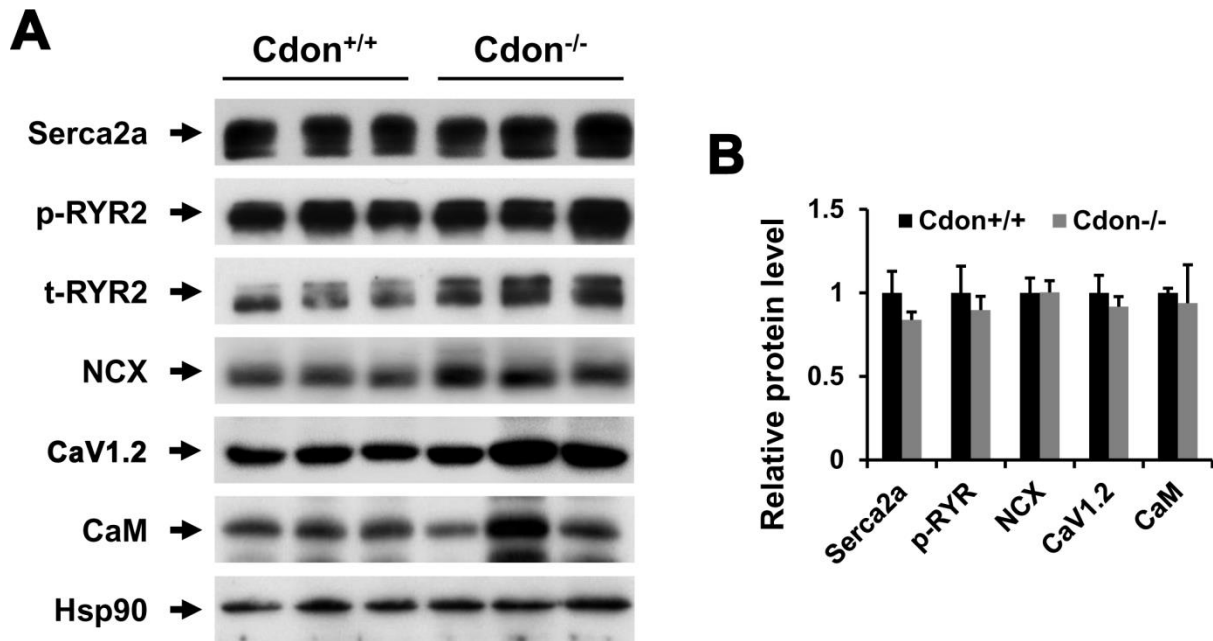

**SI Appendix figure 9. Immunoblotting analysis for calcium cycling proteins of *Cdon*<sup>+/+</sup> and *Cdon*<sup>-/-</sup> heart lysates.** (A) 2 weeks old *Cdon*<sup>+/+</sup> and *Cdon*<sup>-/-</sup> heart lysates were subjected to western blot analysis. Hsp90 used as loading control. (B) Quantification of relative protein levels. n=4 for each group.

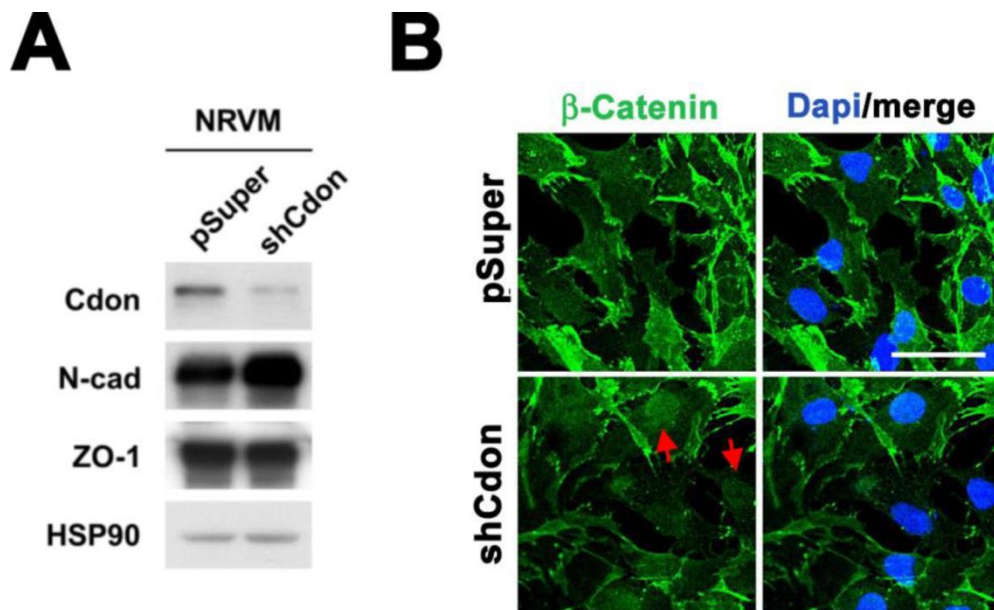

**SI Appendix figure 10. Cdon deficiency causes elevated N-cadherin expression and nuclear  $\beta$ -catenin accumulation in NRVM cells.**

(A) Immunoblot analysis of NRVM cells transfected with the control shRNA (pSuper) or Cdon shRNA (shCdon) vectors for N-cadherin, ZO-1 and Cdon. (B) Immunostaining of  $\beta$ -catenin in NRVM cells transfected with pSuper or shCdon plasmids. Arrows indicate nuclei with accumulation of  $\beta$ -catenin. Note that Cdon depleted cells have more nuclear  $\beta$ -catenin accumulation. Scale bar = 20  $\mu$ m.



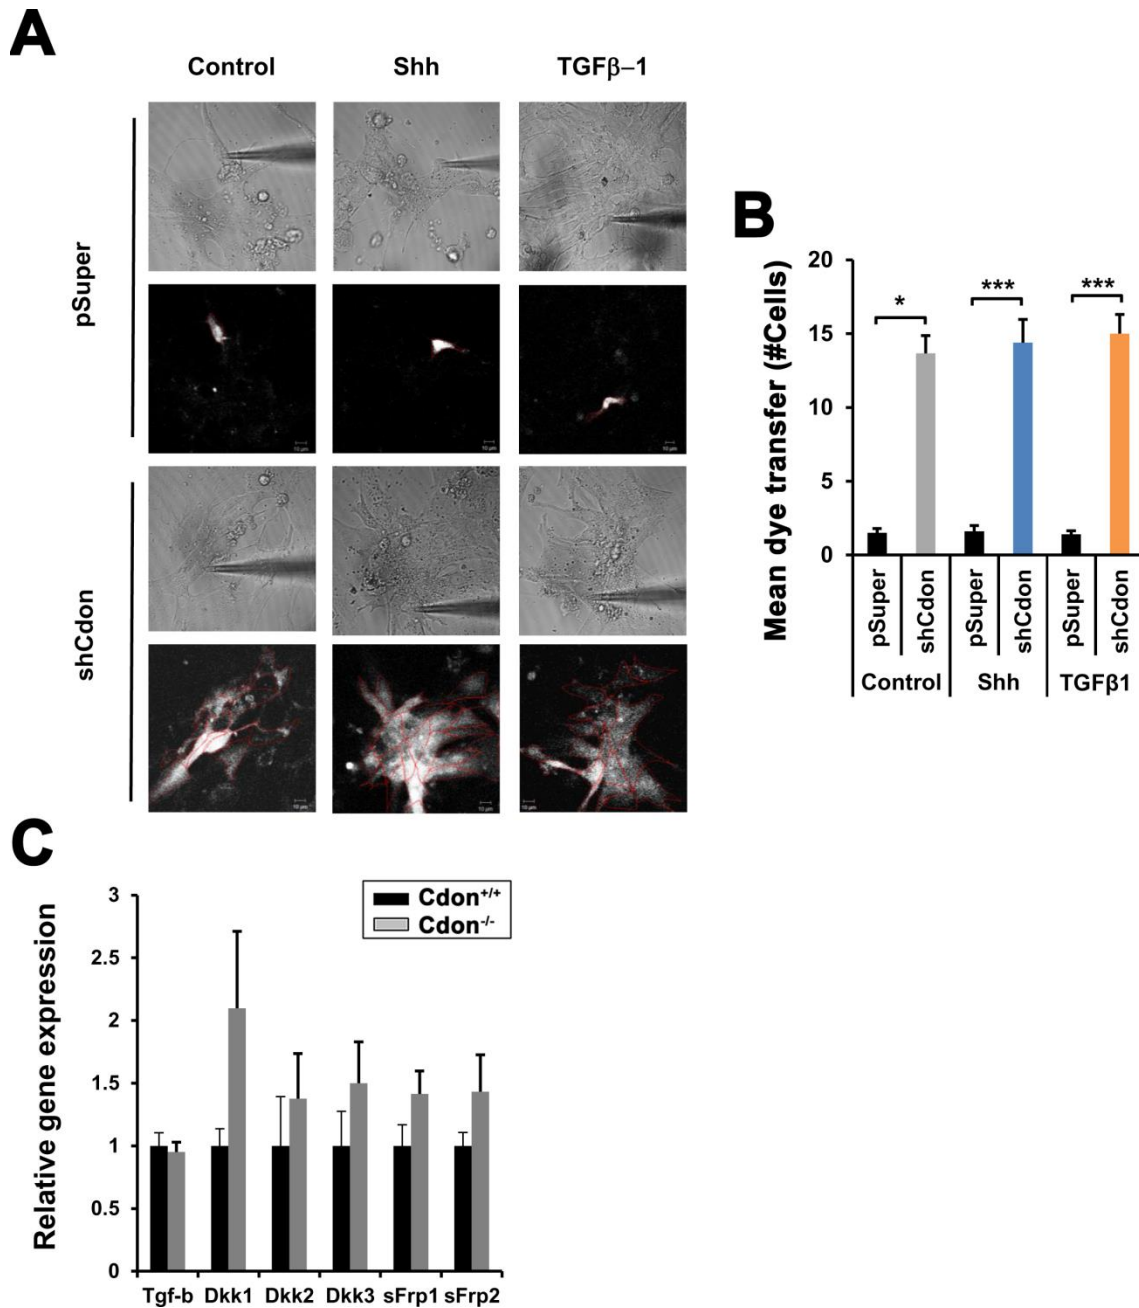

**SI Appendix figure 11. Treatment of Shh or TGF-β has no effect on LY dye transfer in control or Cdon depleted NRVM cells.** (A) Representative images for LY dye transfer in control, Shh (250ng/ml) or hTGF-β (2ng/ml) treated control or Cdon-depleted NRVM. Scale bar = 10µm. (B) Quantification of the mean dye transfer in panel A. \* $p < 0.05$ , \*\*\* $p < 0.001$  vs control. N=4 per each sample. (C) qRT-PCR analysis of RNAs isolate from *Cdon*<sup>+/+</sup> and *Cdon*<sup>-/-</sup> hearts for Wnt signaling modulator including TGF-β, Dkk1, Dkk2, Dkk3, sFrp1 and sFrp2. N=4 for each group.

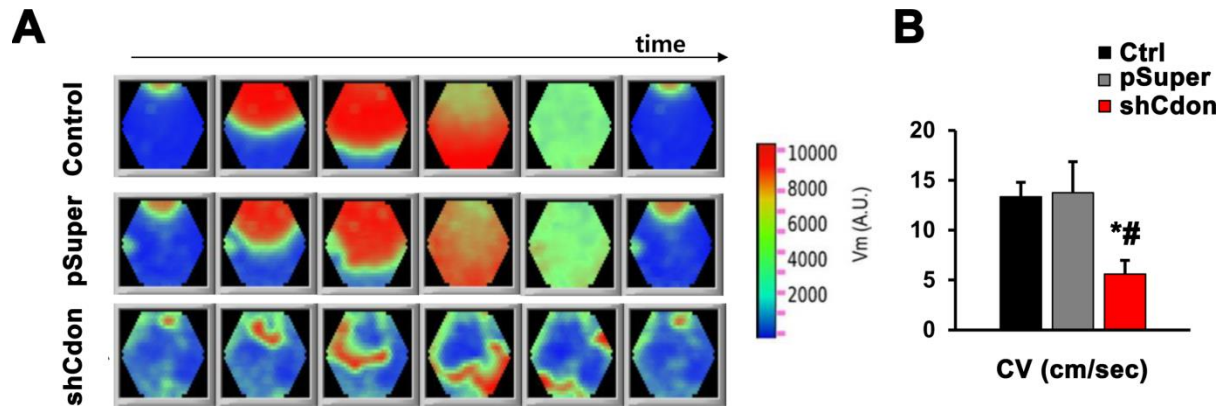

**SI Appendix figure 12. Optical mapping analysis for NRVM cells control or transfected with, pSuper or shCdon vectors.** (A) Snapshots of the propagation of voltage wave through the monolayers of NRVM. From left to right, each row shows the propagation of one wavefront from initiation until it dies out. The last frame of each row is the initiation of a second voltage wave. Time intervals are arbitrary and not equal between different frames. (B) Quantification for conduction velocity of NRVM cells in panel A. \* $P < 0.005$  vs control, # $P < 0.05$  vs pSuper. N=6 (control); 3 (pSuper); 5 (shCdon).

SI Appendix Table 1. ECG parameters in *Cdon*<sup>-/-</sup> mice

|                  | <i>Cdon</i> <sup>+/+</sup> | <i>Cdon</i> <sup>+/-</sup> | <i>Cdon</i> <sup>-/-</sup> | <i>P</i> value |
|------------------|----------------------------|----------------------------|----------------------------|----------------|
| Number           | 9                          | 5                          | 12                         |                |
| RR interval (ms) | 140.3±8.1                  | 139.4±1                    | 138.5±9                    | NS             |
| PR interval (ms) | 15.4±2.2                   | 15.1±3.8                   | 14.4±3.2                   | NS             |
| P wave (ms)      | 14.2±1.3                   | 16.4±2.5                   | 17.2±3.8                   | NS             |
| QRS complex (ms) | 15.4±1.8                   | 15.3±1.6                   | 11±0.6                     | NS             |
| QT interval (ms) | 38.6±2.1                   | 38.8±1.3                   | 29±2.1                     | <0.05          |
| QTc (ms)         | 100.8±9.8                  | 101.8±11.4                 | 79.7±7.1                   | <0.05          |

SI Appendix Table 2. The gene lists of GO analysis with *Cdon*<sup>+/+</sup> and *Cdon*<sup>-/-</sup> P1 hearts.

| Gene annotation                    | Status               | Official gene symbol                                                                                  | No. of genes |
|------------------------------------|----------------------|-------------------------------------------------------------------------------------------------------|--------------|
| Cell adhesion                      | Up-regulated genes   | Erf, Myl12b, Ntn1, Nhej1, Gp1ba, Pcdhb20, Pcdhb19, Tnfrsf4, Pcdh11x, Il7r, Vnn1, Col4a3, Cntn5, Crtam | 14           |
|                                    | Down-regulated genes | Cass4, Cd86, Ctnnd2, Gp9, Otoa, Itgax, Micall2, Pcdh17, Angpt1, Frem2, Celsr1, Cdh11, Src, Tek        | 14           |
| Regulation of transferase activity | Up-regulated genes   | Ankrd54, Itrip1, Agap2, Sdc4, Gp1ba, Irs1, Spry4, Tnfrsf4, Errfi1, Fam72a, Serinc2                    | 11           |
|                                    | Down-regulated genes | Tlr1, Map3k9, Ghrl, Fgd2, Cdk5r2, Pak1, Angpt1, C1qtnf2, Pkia, Map3k1, Src, Csf1r, Ctc1, Tek          | 14           |
| Regulation of cell motion          | Up-regulated genes   | Timp1, Ntn1, Ppargc1a, Sdc4, Dock5, Irs1, Tmeff2, Hoxa7, Bcl6                                         | 9            |
|                                    | Down-regulated genes | Mmp28, Fgf7, Pak1, Igfbp5, Myo1f, Angpt1, Scai, Arap1, Map3k1, Src, Csf1r, Tek                        | 11           |
| Response to hormone stimulus       | Up-regulated genes   | Timp1, Ppargc1a, Slc25a33, Irs1, Errfi1, Lipc, Tox2, Ptprn, Lct, Aldob, Fgf23, Esr2                   | 12           |
|                                    | Down-regulated genes | Agrp, Ghrl, Pak1, Igfbp5, Sdc1, Src, Tek, Med12                                                       | 8            |
| Regulation of cell migration       | Up-regulated genes   | Timp1, Ntn1, Ppargc1a, Sdc4, Dock5, Irs1, Tmeff2, Hoxa7                                               | 8            |
|                                    | Down-regulated genes | Mmp28, Fgf7, Pak1, Igfbp5, Myo1f, Angpt1, Scai, Map3k1, Src, Csf1r, Tek                               | 11           |
| Enzyme linked receptor protein     | Up-regulated genes   | Chn1, Irs1, Col4a3, Dlx5, Fgf23                                                                       | 5            |
|                                    | Down-regulated genes | Fgf8, Fgf7, Angpt11, Angpt1, Arap1, Map3k1, Wfikkn2, Src, Csf1r, Tek                                  | 10           |
| Peptide metabolic process          | Up-regulated genes   | Gsr, Pcsk5, Eef1e1, Slc25a33, Eif2s3x, Pcsk1                                                          | 6            |
|                                    | Down-regulated genes | Ddx3y, Eif2s3y, Gm4832, Gstt1, Bace2, Slc25a14                                                        | 6            |
| Response to extracellular stimulus | Up-regulated genes   | Ppargc1a, Atf3, Lipc, Oprm1, Lct, Aldob, Fgf23                                                        | 7            |
|                                    | Down-regulated genes | Ghrl, Gstt1, Src                                                                                      | 3            |
| Response to nutrient               | Up-regulated genes   | Lct, Fgf23                                                                                            | 2            |
|                                    | Down-regulated genes | Gstt1                                                                                                 | 1            |



**SI Appendix Table 3. KEGG pathway analysis with RNA sequencing data.**

| <b>Pathway</b>                          | <b>Gene Symbol</b>                                                                                                        |
|-----------------------------------------|---------------------------------------------------------------------------------------------------------------------------|
| <b>Metabolic pathways</b>               | Aldob, Asl, Bckdhb, Cda, Cers4, Lct, Lipc, Lipt2, Man1a2, Mvd, Mnmt, Pigv, Pla2g4c, Pld4, Prodh, Rbks, Sardh, Sat2, Sgms1 |
| <b>PI3K-Akt signaling pathway</b>       | Angpt1, Col4a3, Creb3l1, Csf1r, Fgf23, Fgf7, Fgf8, Gm5741, Il7r, Irs1, Osmr, Tek                                          |
| <b>Regulation of actin cytoskeleton</b> | Fgf23, Fgf7, Fgf8, Gm5741, Itgax, Myl12b, Pak1, Pip4k2c, Src, Ssh3                                                        |
| <b>RAP1 signaling pathway</b>           | Angpt1, Apbb1ip, Calm3, Csf1r, Efna4, Fgf23, Fgf7, Fgf8, Mapk12, Pard6g, Plcb4, Rac3, Src, Tek                            |
| <b>MAPK signaling pathway</b>           | Fgf23, Fgf7, Fgf8, Gm5741, Il1r2, Map3k1, Pak1, Pla2g4c, Ptpn7                                                            |
| <b>RAS signaling pathway</b>            | Angpt1, Calm3, Csf1r, Efna4, Fgf23, Fgf7, Fgf8, Gm5741, Gng3, Pak1, Pla2g4c, Rac3, Tbk1, Tek                              |

**SI Appendix Table 4. Primer sequences for qRT-PCR analysis**

| <b>Gene</b>                   |         | <b>5' to 3'</b>          | <b>T<sub>m</sub><br/>(°C)</b> |
|-------------------------------|---------|--------------------------|-------------------------------|
| <b>Nppb</b>                   | Forward | AAATGGCCCAGAGACAGCTC     | 58                            |
|                               | Reverse | CAACTTCAGTGCGTTACAGCC    | 58                            |
| <b>Col4a3</b>                 | Forward | ATTCCAGAAGCTGGATGCCC     | 59                            |
|                               | Reverse | CTGCCTACGGATGGTTCTCC     | 58                            |
| <b>Timp3</b>                  | Forward | TTCTGCAACTCCGACATCGT     | 58                            |
|                               | Reverse | TTTCAGAGGCTTCCGTGTGA     | 58                            |
| <b>Gja5</b>                   | Forward | AAGCAGAAATTGCGGGATGC     | 58                            |
|                               | Reverse | CTACGATGAAGGCCACCTCC     | 58                            |
| <b>Ace</b>                    | Forward | GATGCCATGAAGCTGGGCTA     | 59                            |
|                               | Reverse | CTTCTGCGCGAGCGGT         | 59                            |
| <b>Ctgf</b>                   | Forward | TCCACCCGAGTTACCAA        | 53                            |
|                               | Reverse | TTAGGTGTCCGGATGC         | 51                            |
| <b>Gja1</b>                   | Forward | CCAGCCCTTAGCTATCGTGG     | 58                            |
|                               | Reverse | CCTCCACGGGAACGAAATGA     | 58                            |
| <b>Timp1</b>                  | Forward | CTACGATGAAGGCCACCTCC     | 58                            |
|                               | Reverse | ACTCTTCACTGCGGTTCTGG     | 58                            |
| <b>TGF-<math>\beta</math></b> | Forward | TCGACATGGAGCTGGTGAAA     | 55                            |
|                               | Reverse | CTGGCGAGCCTTAGTTTGGA     | 57                            |
| <b>Dkk1</b>                   | Forward | CCAACGCGATCAAGAACCTGC    | 60                            |
|                               | Reverse | CACATAGCGTGCCTCATGCAG    | 60                            |
| <b>Dkk2</b>                   | Forward | CACTATTCCAACCATGACCTGGGA | 60                            |
|                               | Reverse | CCTTTGCACAGTCACACCTCTGG  | 61                            |
| <b>Dkk3</b>                   | Forward | ATGCTATGCACCCGAGACAGT    | 58                            |
|                               | Reverse | CCTTCAGGCTCCAGTTCCCA     | 60                            |
| <b>sFRP1</b>                  | Forward | CAAGAAGATGGTGCTGCCCAAC   | 60                            |
|                               | Reverse | GAAGCCGAAGAAGTGCATGACC   | 60                            |
| <b>sFRP2</b>                  | Forward | GAGACCATCCAGCCGTGTCA     | 60                            |
|                               | Reverse | GCAGGCTTCACACACCTTGG     | 60                            |
